# Supplementary material for: CCL3 predicts exceptional response to TGFβ inhibition in basal-like pancreatic cancer enriched in LIF-producing macrophages
Source: PubMed Central journal article supplement — NPJ Precis Oncol. 2024 Oct 30;8:246. doi: 10.1038/s41698-024-00742-3 (PMC11525688; doi:10.1038/s41698-024-00742-3), 2024-10-30

## **SUPPLEMENTARY INFORMATIONS**

### **CCL3 Predicts Exceptional Response to TGF $\beta$ Inhibition in Basal-Like Pancreatic Cancer Enriched in LIF-Producing Macrophages**

Silvia Pietrobono<sup>1</sup>, Monica Bertolini<sup>1</sup>, Veronica De Vita<sup>1</sup>, Fabio Sabbadini<sup>1</sup>, Federica Fazzini<sup>3</sup>, Cristina Frusteri<sup>2</sup>, Enza Scarlato<sup>1</sup>, Domenico Mangiameli<sup>1</sup>, Alberto Quinzii<sup>1</sup>, Simona Casalino<sup>1</sup>, Camilla Zecchetto<sup>1</sup>, Valeria Merz<sup>1</sup> and Davide Melisi<sup>1,3\*</sup>.

#### **LIST OF SUPPLEMENTARY MATERIALS**

**Supplementary Figure 1:** Expression of Ccl3 in PDAC.

**Supplementary Figure 2:** Gating strategy.

**Supplementary Figure 3:** Ccl3 favors M2-polarization and TGF $\beta$  pathway activation in BMDM.

**Supplementary Figure 4:** RAW264.7 macrophages sustain the migratory ability of PDAC cells induced by Ccl3.

**Supplementary Figure 5:** Flow cytometry analysis of macrophages in high- and low-Ccl3 PDAC tumors.

**Supplementary Figure 6:** Effect of Ccr5 inhibition in RAW264.7 macrophages on Tgfb2 expression.

**Supplementary Figure 7:** Inhibition of TGF $\beta$  signaling suppresses recruitment and M2-polarization of macrophages.

**Supplementary Figure 8:** Pre-treatment of RAW264.7 macrophages with galunisertib prevents their M2-polarization when co-cultured with high-Ccl3 PDAC cells.

**Supplementary Figure 9:** The Ccl3/Ccr5/TGF $\beta$ /Lif axis sustains EMT in PDAC cells

**Supplementary Figure 10:** Inhibition of TGF $\beta$  in macrophages sensitizes Ccl3-high PDAC cells to gemcitabine-based chemotherapy

**Supplementary Figure 11:** Galunisertib suppresses the mesenchymal/basal-like phenotype in mice bearing Ccl3-high tumors

**Supplementary Table 1.** Baseline characteristics of patients enrolled in the H9H-MC-JBAJ clinical trial.

**Supplementary Table 2.** List of primers used in this study.

**Supplementary Table 3.** List of antibodies used in this study.

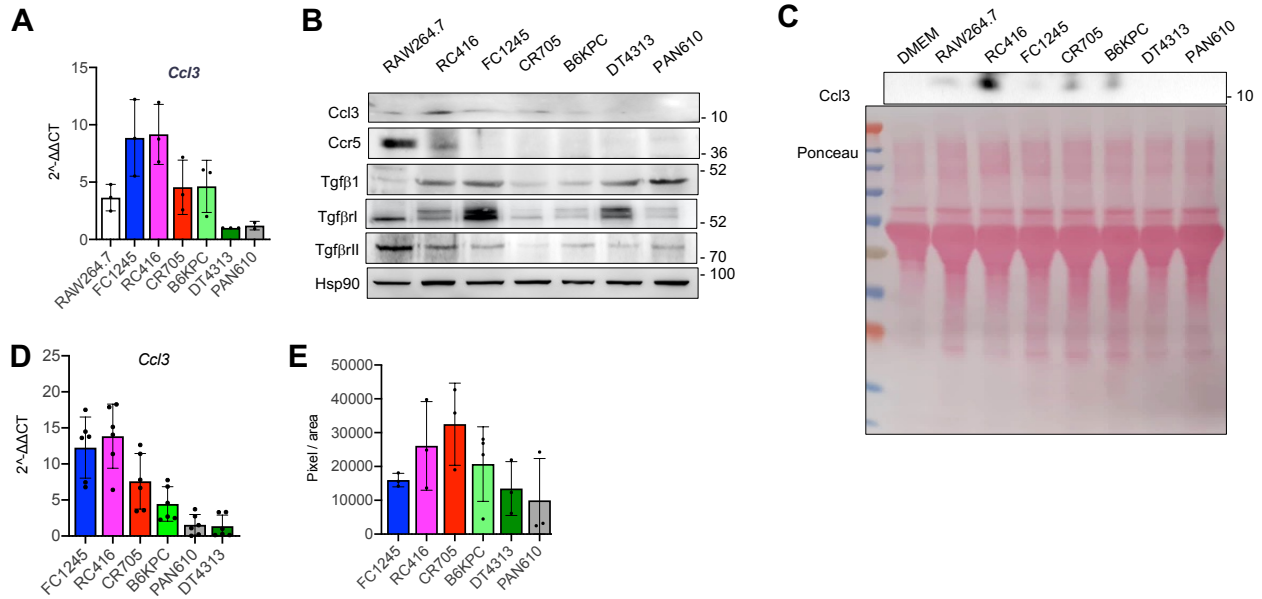

**Supplementary Figure 1. Expression of Ccl3 in PDAC.** (A) Quantitative real-time PCR (qPCR) of Ccl3 in RAW264.7 macrophages and in a panel of PDAC cell lines (FC1245, RC416, CR705, B6KPC, DT4313 and PAN610). Data are shown as mean  $\pm$  s.d (n=3). (B) Representative western blot of Ccl3, Ccr5, Tgfb1, Tgfr1 and Tgfr2 in the whole cell extracts of RAW264.7, RC416, FC1245, CR705, B6KPC, DT4313 and PAN610 cell lines. Hsp90 was used as loading control. (C) Representative western blot of Ccl3 in the conditioned medium of RAW264.7, RC416, FC1245, CR705, B6KPC, DT4313 and PAN610 cell lines. Ponceau served as loading control. (D) qPCR analysis of Ccl3 in tumors from mice bearing FC1245, RC416, CR705, B6KPC, DT4313 and PAN610 cells. Data are shown as mean  $\pm$  s.d (n=6). (E) Pixel intensity measurement of RNA in situ hybridization (ISH) images of Ccl3 in tumor sections from mice bearing FC1245, RC416, CR705, B6KPC, DT4313 and PAN610 cells. Data are shown as mean  $\pm$  s.d (n=3).

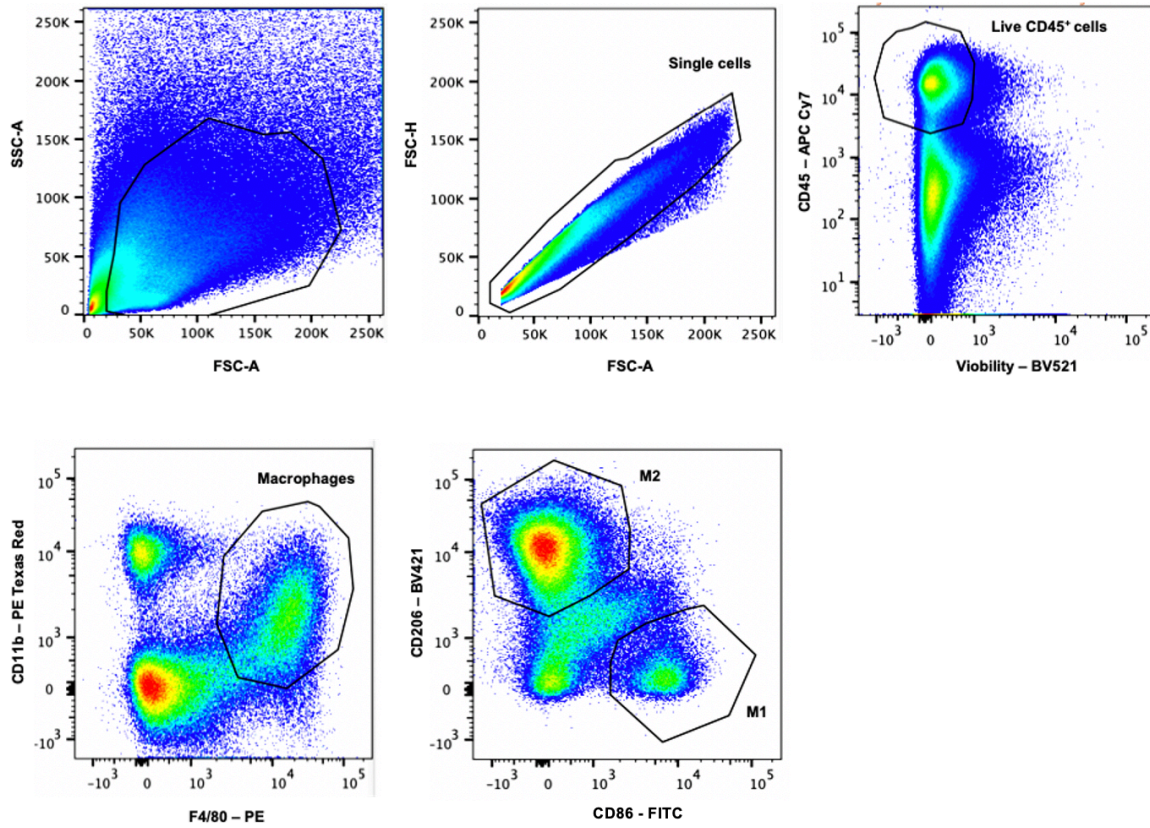

**Supplementary Figure 2. Gating strategy.** Single-cell suspensions were first gated for physical parameters, including forward scatter (FSC) for size, and side scatter (SSC) for granularity. TAMs were gated based on CD45<sup>+</sup>/Cd11b<sup>+</sup>/F4/80<sup>+</sup> positivity, and evaluated for the expression of Cd86 and Cd204 (M1 TAMs: Cd86<sup>+</sup>/Cd204<sup>-</sup>; M2 TAMs: Cd86<sup>-</sup>/Cd204<sup>+</sup>). Sample FACS plots of RC416-bearing C57BL/6J mice are shown.

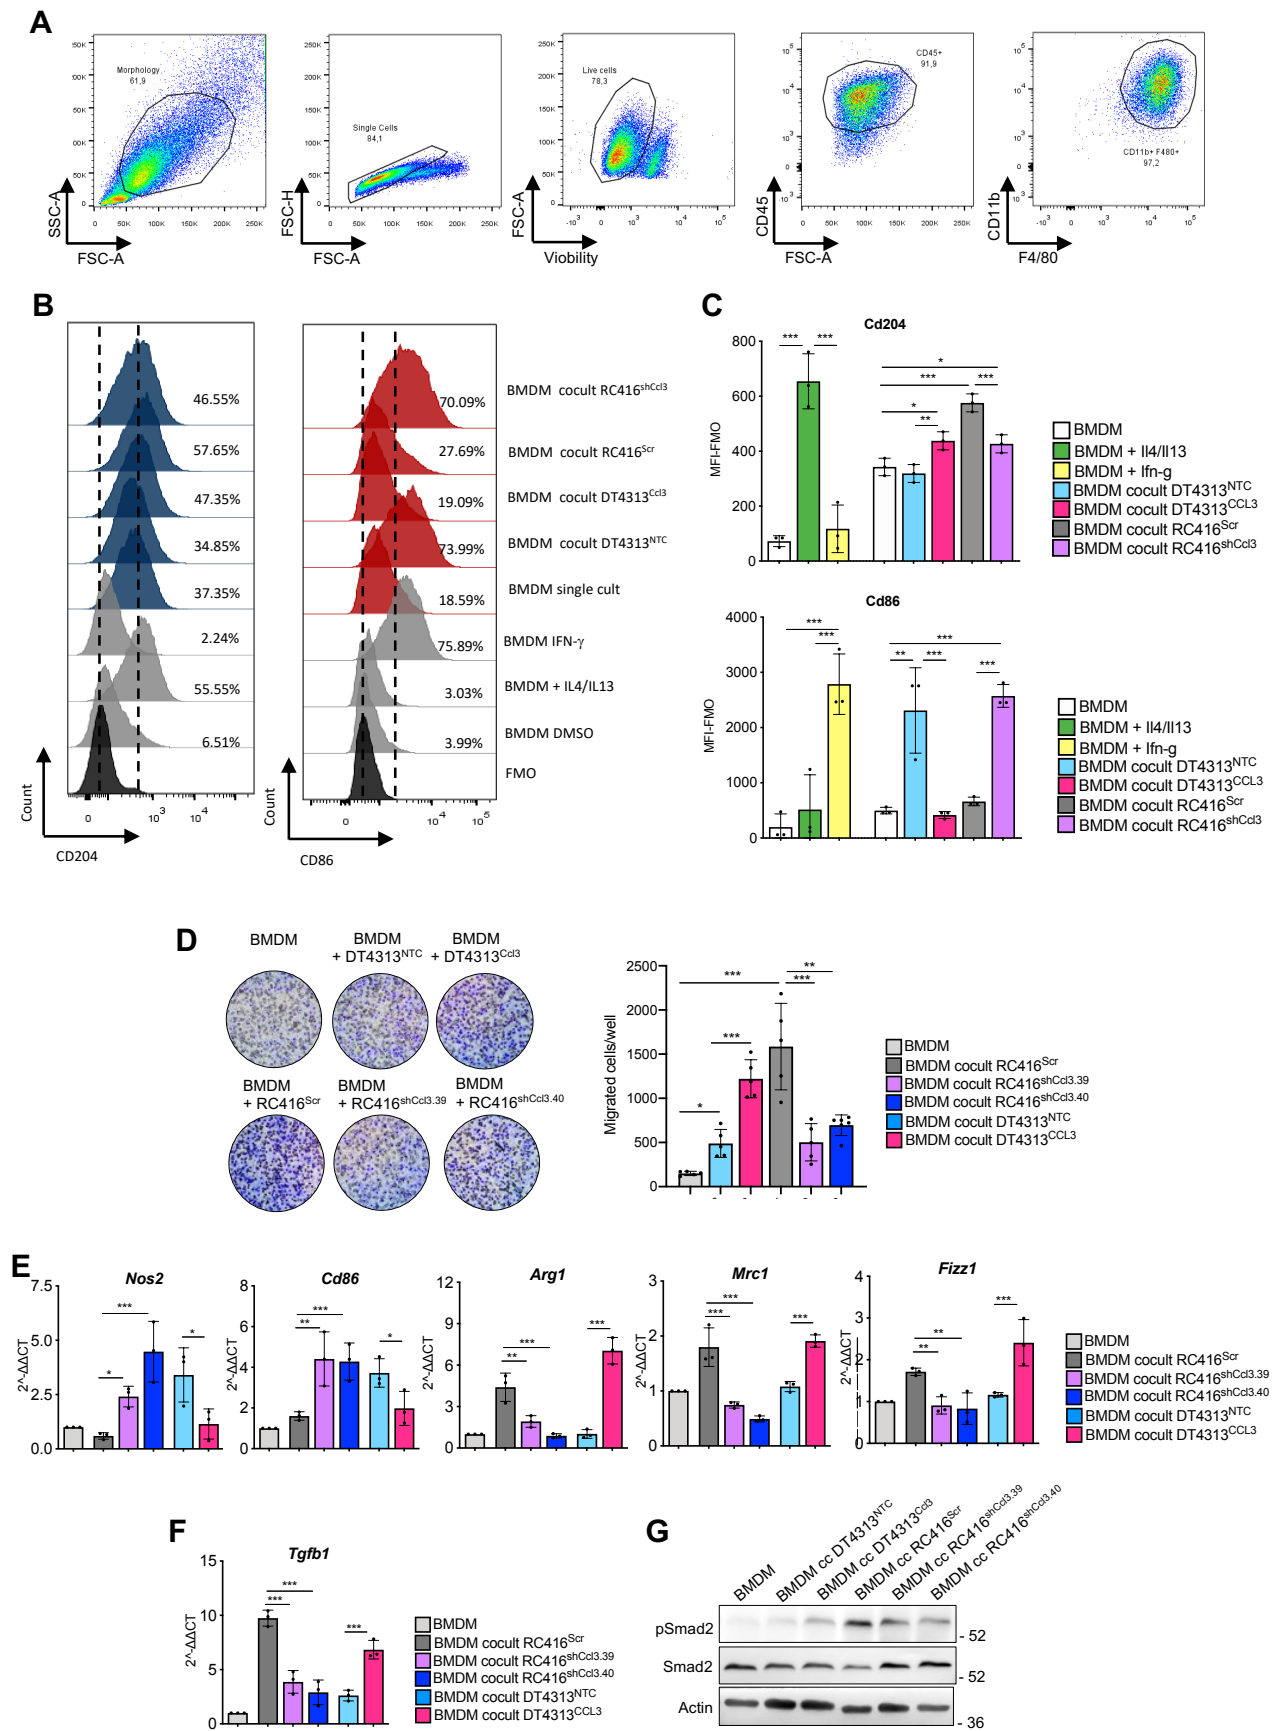

**Supplementary Figure 3: *Ccl3* favors M2-polarization and TGFβ pathway activation in BMDM. (A) Gating strategy. (B) Representative FCM plots of Cd204 and Cd86 in BMDM as single**



culture or co-cultured with RC416<sup>Scr</sup>, RC416<sup>shCcl3</sup>, DT4313<sup>NTC</sup> or DT4313<sup>Ccl3</sup> PDAC cells for 48h. IFN- $\gamma$  or IL-4/IL-13 were used as positive control for M1 or M2 polarization, respectively. (C) Flow cytometry analysis of Cd204 and Cd86 expression of BMDM as single-culture or co-cultured as in (B). Data are shown as mean  $\pm$  s.d (n=3). (D) Transwell migration assay of BMDM as single culture or co-cultured with RC416<sup>Scr</sup>, RC416<sup>shCcl3.39</sup>, RC416<sup>shCcl3.40</sup>, DT4313<sup>NTC</sup> or DT4313<sup>Ccl3</sup> PDAC cells for 48h. Results show mean  $\pm$  s.d of 5 biological replicates. P value was calculated by ANOVA and Tukey's test. (E) qPCR analysis of M1 markers *Nos2* and *Cd86*, and of M2 markers *Arg1*, *Mrc1* and *Fizz1* in BMDM as single cultures or co-cultured with RC416 or DT4313 transduced as indicated. Data are shown as mean  $\pm$  s.d (n=3). P value was calculated by ANOVA and Tukey's test. (F) qPCR of *Tgfb1* in BMDM as single cultures or co-cultured with RC416 or DT4313 transduced as indicated. Data are shown as mean  $\pm$  s.d (n=3). P values in C-F were calculated by ANOVA and Tukey's test. \*p<0.05; \*\*p<0.01; \*\*\*p<0.001. (G) Representative western blot of pSmad2 and Smad2 in BMDM as single culture or in co-culture with RC416 or DT4313 transduced as indicated. Actin was used as loading control.

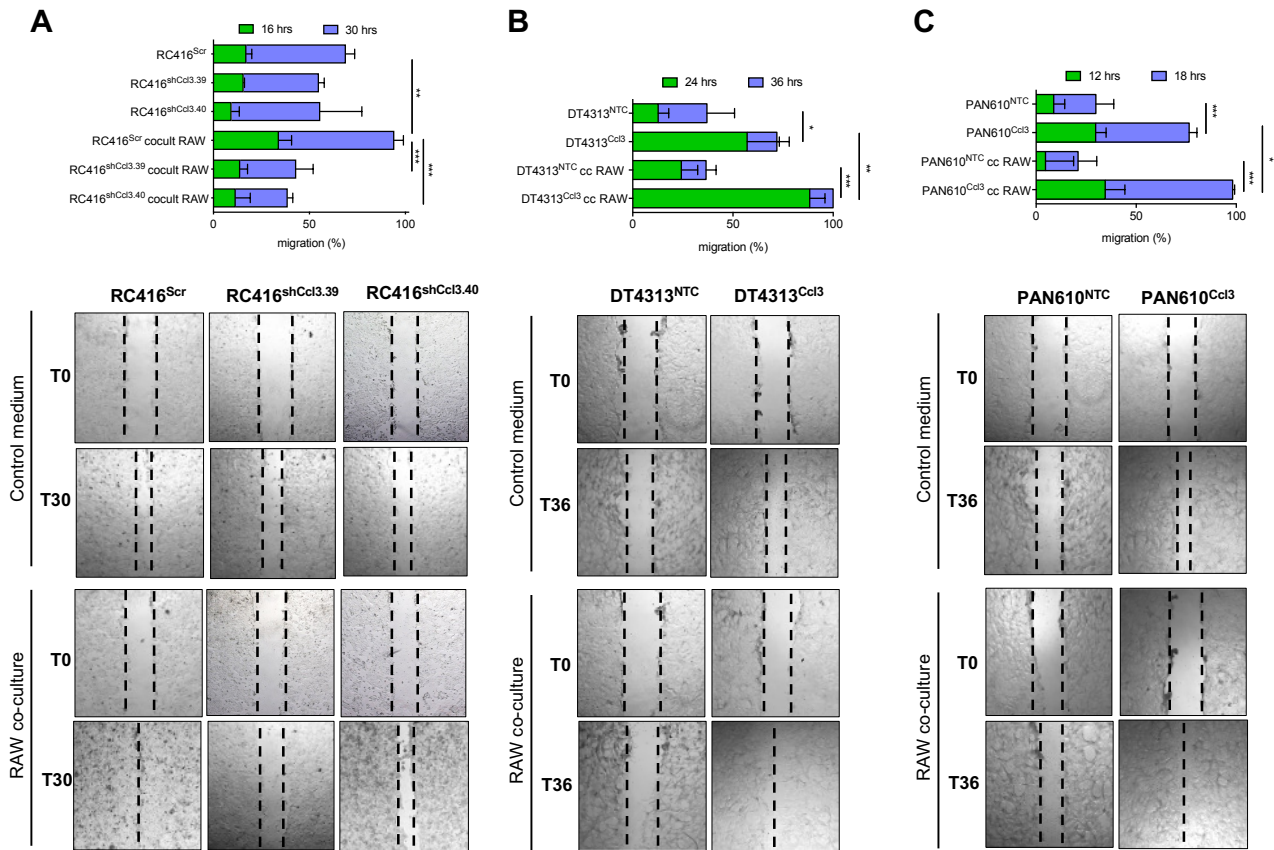

**Supplementary Figure 4. RAW264.7 macrophages sustain the migratory ability of PDAC cells induced by Ccl3.** (A) Scratch assay (wound closure) in RC416 (A), DT4313 (B) and PAN610 (C) cells transduced as indicated, as single cultures or co-cultured with RAW264.7 macrophages. Data are represented as mean  $\pm$  s.d. P value was calculated by ANOVA and Tukey's test (n=3 biological independent experiments). \*p<0.05; \*\*p<0.01; \*\*\*p<0.001.

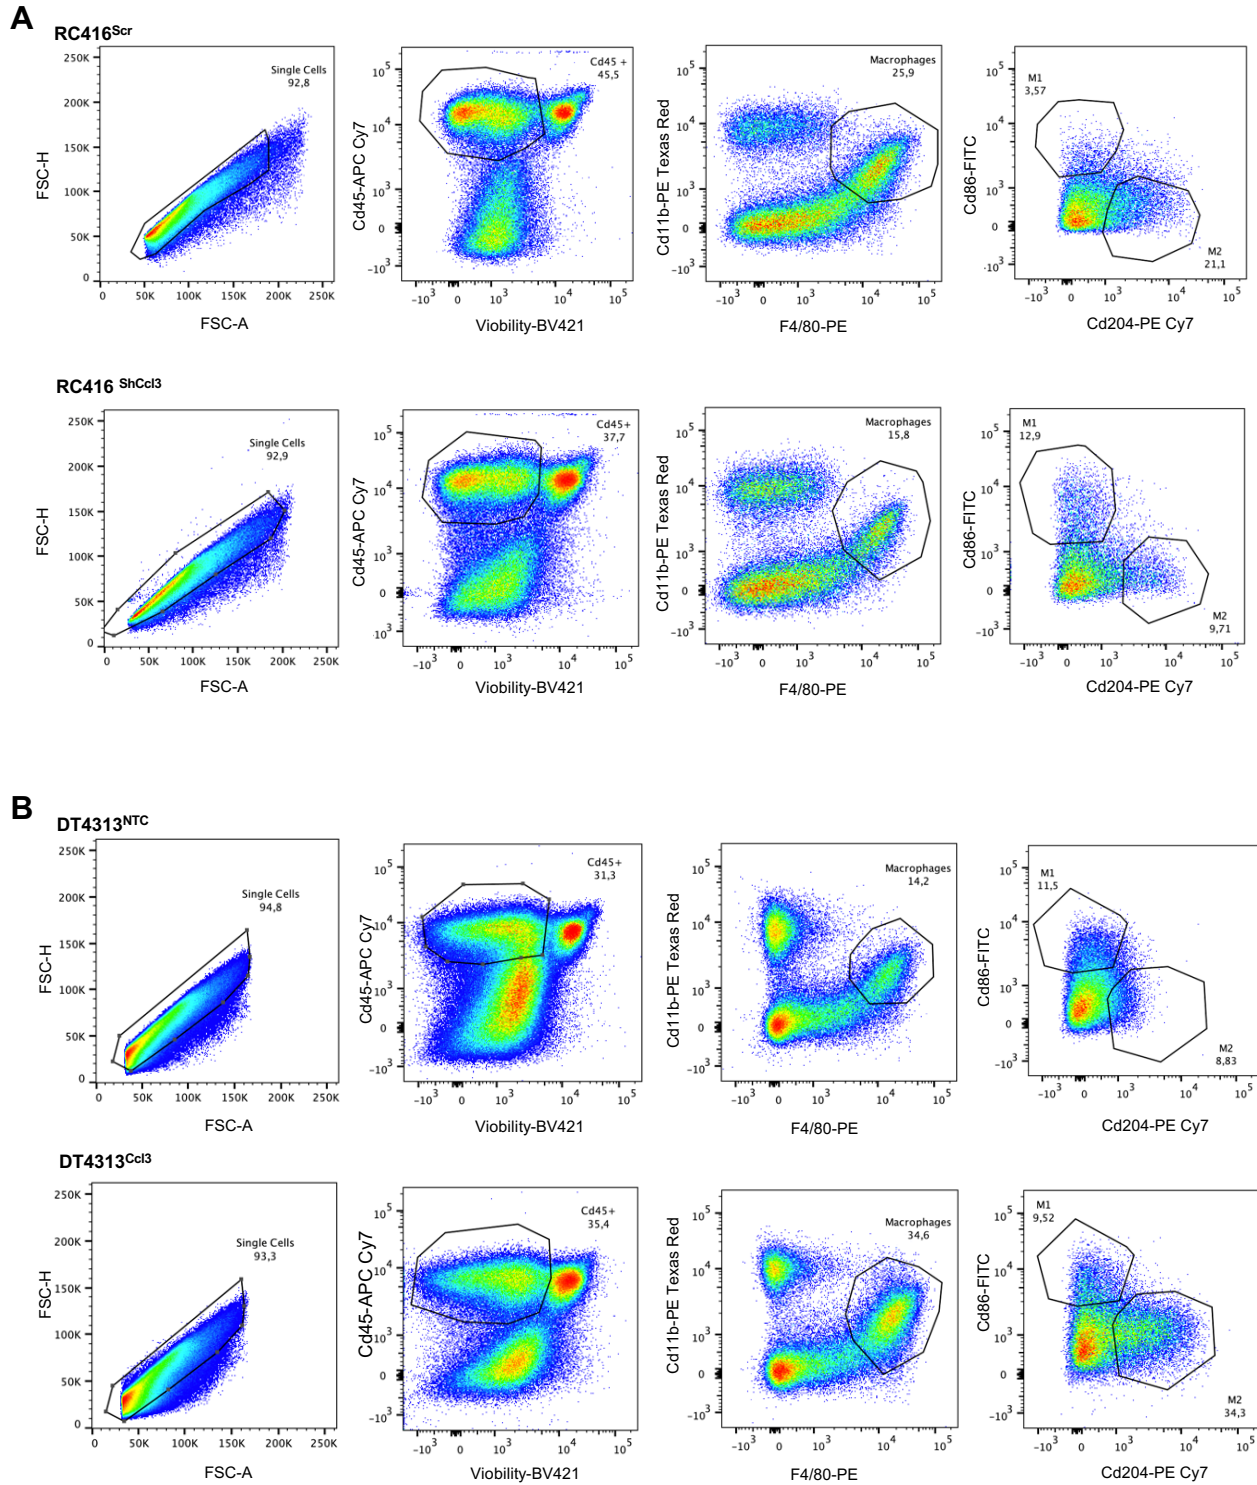

**Supplementary Figure 5. Flow cytometry analysis of macrophages in high- and low-Ccl3 PDAC tumors.** Single-cell suspensions were gated for physical parameters (FSC and SSC). Live TAMs were gated based on CD45<sup>+</sup>/Cd11b<sup>+</sup>/F4/80<sup>+</sup> positivity, and analyzed as M1 (Cd86<sup>+</sup>/Cd204<sup>-</sup>) or M2 (Cd86<sup>-</sup>/Cd204<sup>+</sup>) TAMs. Representative plots at 4-weeks after treatment of tumors from mice bearing RC416<sup>Scr</sup> or RC416<sup>shCcl3</sup> (A) and DT4313<sup>NTC</sup> or DT4313<sup>Ccl3</sup> (B) cells are shown.

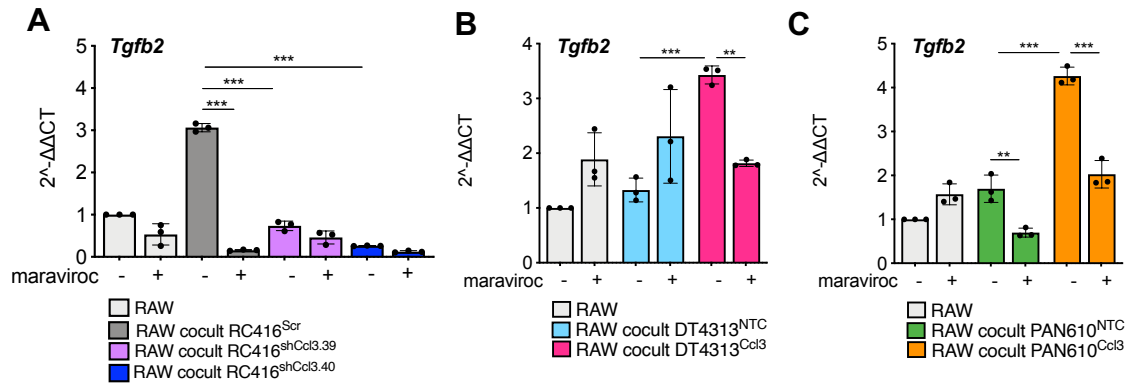

**Supplementary Figure 6: Effect of Ccr5 inhibition in RAW264.7 macrophages on Tgfb2 expression.** qPCR analysis of *Tgfb2* in RAW264.7 as single culture or co-cultured with RC416 (A), DT4313 (B) or PAN610 (C) transduced as indicated and treated with DMSO or 5 $\mu$ M maraviroc for 24h. Data are shown as mean  $\pm$  s.d (n=3). P value was calculated by ANOVA and Tukey's test. \*\*p<0.01; \*\*\*p<0.001.

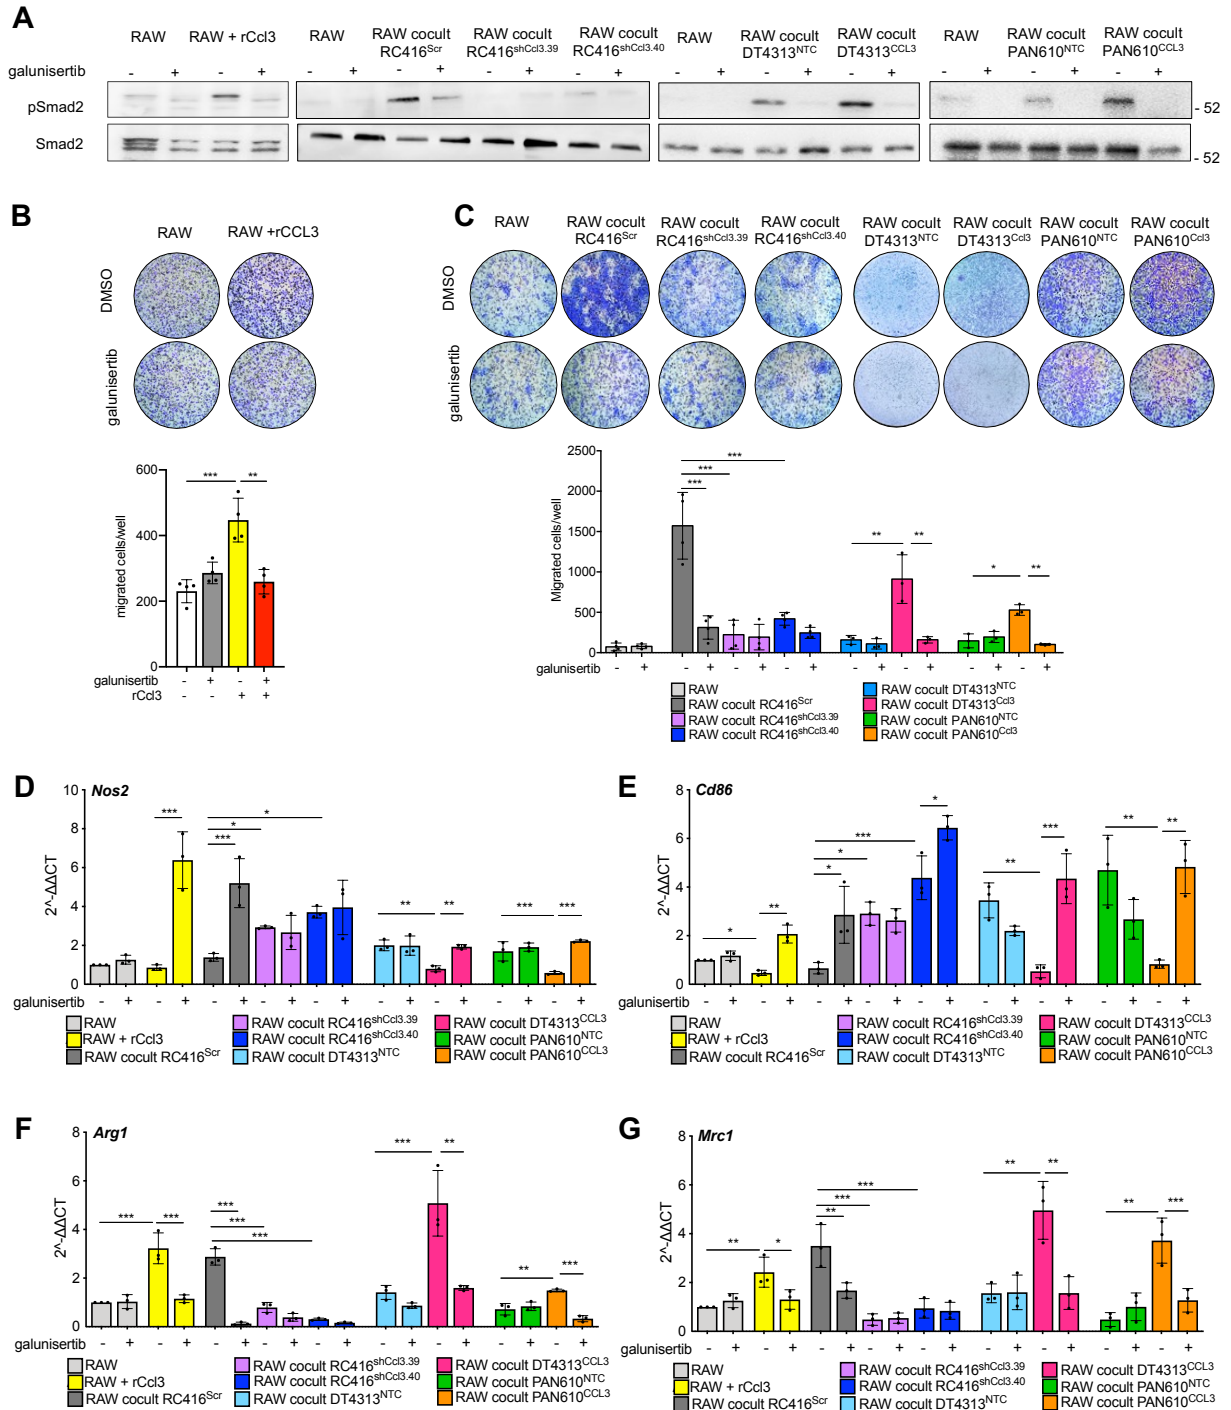

**Supplementary Figure 7. Inhibition of TGF $\beta$  signaling suppresses recruitment and M2-polarization of macrophages.** (A) Representative western blot of pSmad2 and Smad2 in RAW264.7 upon rCcl3 addition, as single cultures or co-cultured with RC416, DT4313 or PAN610 transduced as indicated and treated with 5 $\mu$ M galunisertib for 24h. (B,C) Transwell migration assay of RAW264.7 macrophages unstimulated or stimulated with rCcl3 (B), and as single culture or co-

cultured with RC416<sup>Scr</sup>, RC416<sup>shCcl3.39</sup>, RC416<sup>shCcl3.40</sup>, DT4313<sup>NTC</sup>, DT4313<sup>Ccl3</sup>, PAN610<sup>NTC</sup> or PAN610<sup>Ccl3</sup> PDAC cells, upon treatment with DMSO or 5 $\mu$ M galunisertib for 48h. Results show mean  $\pm$  s.d of 4 (rCcl3 and RC416) or of 3 (DT4313 and PAN610) biological replicates. P value was calculated by ANOVA and Tukey's test. (D-G) qPCR analysis of M1 markers *Nos2* (D) and *Cd86* (E), and of M2 markers *Arg1* (F) and *Mrc1* (G) in RAW264.7 macrophages treated with rCcl3, as single cultures or co-cultured with RC416, DT4313 or PAN610 transduced and treated as indicated. Data are shown as mean  $\pm$  s.d (n=3). P value was calculated by ANOVA and Tukey's test. \*p<0.05; \*\*p<0.01; \*\*\*p<0.001.



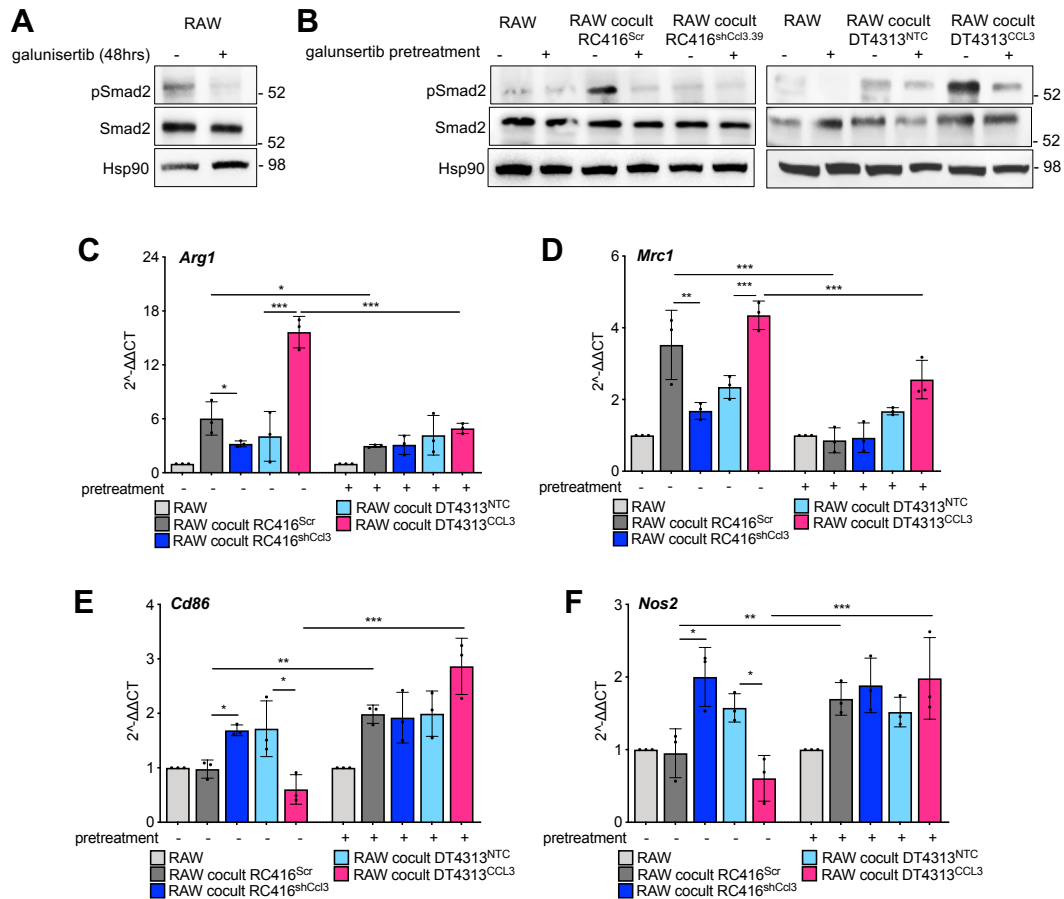

**Supplementary Figure 8: Pre-treatment of RAW264.7 macrophages with galunisertib prevents their M2-polarization when co-cultured with high-Ccl3 PDAC cells.** (A) Representative western blot of pSmad2 and Smad2 in RAW264.7 cells after treatment with DMSO or 5 $\mu$ M galunisertib for 48h. (B) RAW264.7 cells pre-treated with DMSO or galunisertib as in (A) were seeded as single culture or in co-culture with RC416 and DT4313 PDAC cells transduced as indicated. Representative western blot of pSmad2 and Smad2 are shown. Hsp90 in A and B was used as loading control. (C-F) qPCR of M2 markers *Arg1* (C) and *Mrc1* (D), and of M1 markers *Cd86* (E) and *Nos2* (F) in RAW264.7 cells pre-treated as in (A), as single culture or in co-culture with RC416 and DT4313 PDAC cells transduced as indicated. Data are shown as mean  $\pm$  s.d (n=3). P value was calculated by ANOVA and Tukey's test. \*p<0.05; \*\*p<0.01; \*\*\*p<0.001.

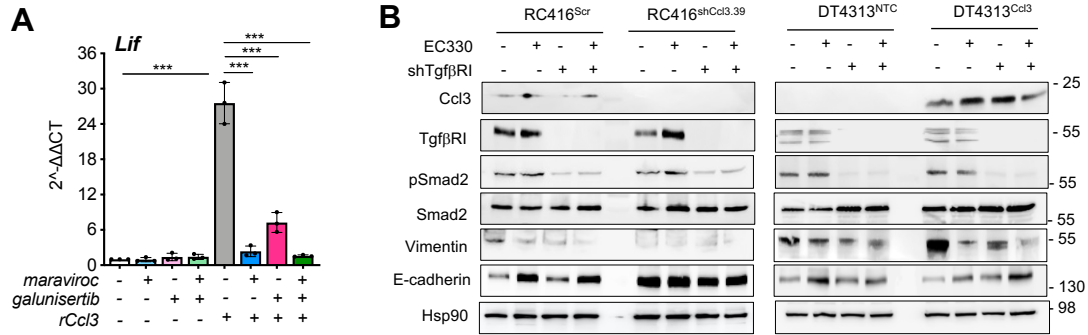

**Supplementary Figure 9: The Ccl3/Ccr5/TGFβ/Lif axis sustains EMT in PDAC cells.** (A) qPCR analysis of *Lif* in RAW264.7 macrophages unstimulated or stimulated with rCcl3 for 48hrs, and treated with maraviroc, galunisertib, their combination or DMSO as control. Data are shown as mean  $\pm$  s.d (n=3). P value was calculated by ANOVA and Tukey's test. \*\*\*p<0.001. (B) Representative western blot of Ccl3, TgfβR1, pSmad2, Smad2, vimentin and E-cadherin in RC416 and DT4313 transduced as indicated, co-cultured with RAW264.7 macrophages and treated with 1μM of the Lif inhibitor EC330 or DMSO as vehicle control. Hsp90 was used as loading control.

**A**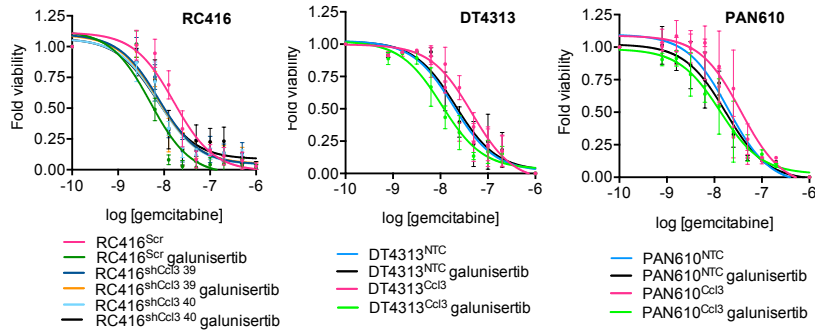**B**

| PDAC cells co-cultured with RAW264.7 macrophages |                               |
|--------------------------------------------------|-------------------------------|
| Treatments                                       | EC50 gemcitabine (nM)         |
| RC416 <sup>Scr</sup>                             | 16.28 (95% CI: 11.19 – 23.68) |
| RC416 <sup>Scr</sup> + GAL                       | 5.07 (95% CI: 3.37 – 7.64)    |
| RC416 <sup>shCcl3.39</sup>                       | 7.65 (95% CI: 5.19 – 11.28)   |
| RC416 <sup>shCcl3.39</sup> +GAL                  | 7.37 (95% CI: 5.04 – 10.79)   |
| RC416 <sup>shCcl3.40</sup>                       | 7.51 (95% CI: 5.35 – 10.54)   |
| RC416 <sup>shCcl3.40</sup> + GAL                 | 6.75 (95% CI: 4.27 – 10.68)   |
| DT4313 <sup>NTC</sup>                            | 17.65 (95% CI: 10.93 – 28.48) |
| DT4313 <sup>NTC</sup> + GAL                      | 19.34 (95% CI: 10.82 – 24.59) |
| DT4313 <sup>Ccl3</sup>                           | 49.25 (95% CI: 30.21 – 80.29) |
| DT4313 <sup>Ccl3</sup> + GAL                     | 9.97 (95% CI: 6.77 – 14.67)   |
| PAN610 <sup>NTC</sup>                            | 21.10 (95% CI: 11.70 – 38.05) |
| PAN610 <sup>NTC</sup> + GAL                      | 17.59 (95% CI: 9.86 – 31.36)  |
| PAN610 <sup>Ccl3</sup>                           | 41.22 (95% CI: 18.74 – 90.67) |
| PAN610 <sup>Ccl3</sup> + GAL                     | 11.96 (95% CI: 6.80 – 21.01)  |

**C**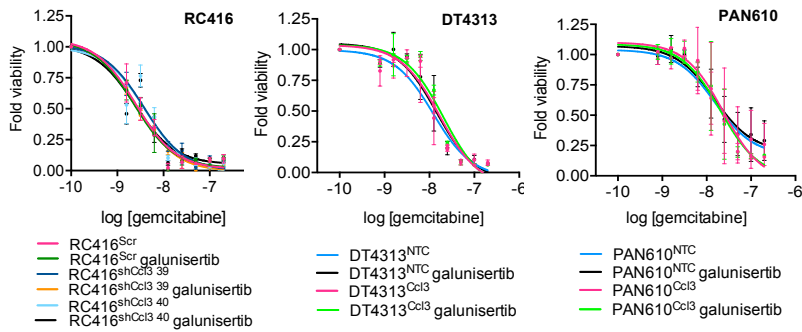**D**

| PDAC cells single cultures       |                               |
|----------------------------------|-------------------------------|
| Treatments                       | EC50 gemcitabine (nM)         |
| RC416 <sup>Scr</sup>             | 2.51 (95% CI: 1.65 – 3.79)    |
| RC416 <sup>Scr</sup> + GAL       | 2.27 (95% CI: 1.49 – 3.45)    |
| RC416 <sup>shCcl3.39</sup>       | 3.79 (95% CI: 2.99 – 4.80)    |
| RC416 <sup>shCcl3.39</sup> +GAL  | 2.63 (95% CI: 2.18 – 3.17)    |
| RC416 <sup>shCcl3.40</sup>       | 4.04 (95% CI: 2.22 – 7.34)    |
| RC416 <sup>shCcl3.40</sup> + GAL | 2.38 (95% CI: 1.26 – 4.49)    |
| DT4313 <sup>NTC</sup>            | 12.23 (95% CI: 7.34 – 20.34)  |
| DT4313 <sup>NTC</sup> + GAL      | 14.38 (95% CI: 8.89 – 2.32)   |
| DT4313 <sup>Ccl3</sup>           | 16.93 (95% CI: 11.69 – 24.5)  |
| DT4313 <sup>Ccl3</sup> + GAL     | 20.67 (95% CI: 13.21 – 32.33) |
| PAN610 <sup>NTC</sup>            | 15.41 (95% CI: 6.47 – 36.65)  |
| PAN610 <sup>NTC</sup> + GAL      | 14.95 (95% CI: 6.87 – 32.58)  |
| PAN610 <sup>Ccl3</sup>           | 23.94 (95% CI: 9.97 – 57.47)  |
| PAN610 <sup>Ccl3</sup> + GAL     | 20.6 (95% CI: 9.91 – 42.82)   |

**E**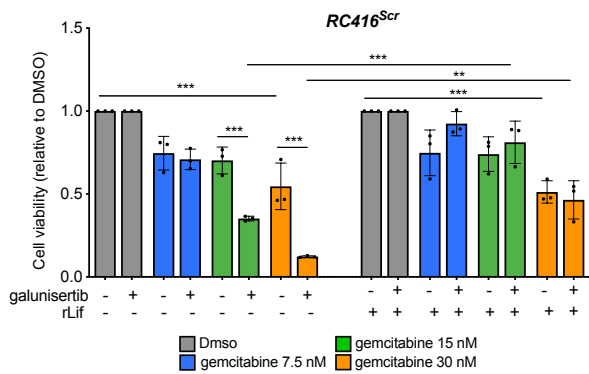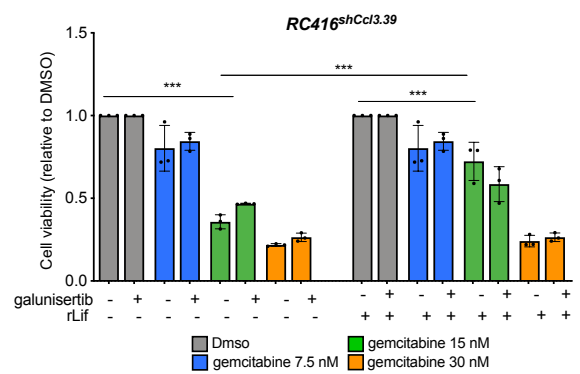**F**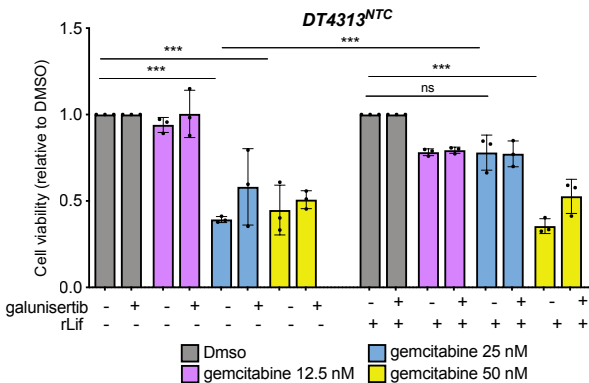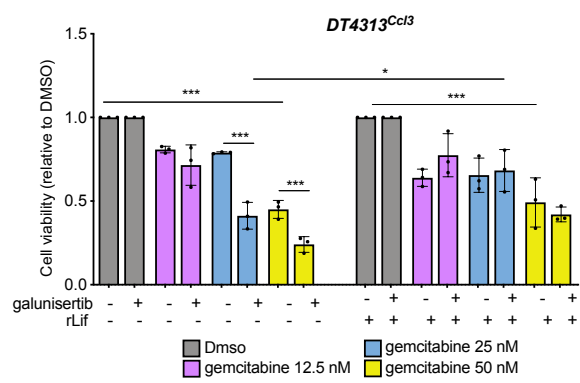

**Supplementary Figure 10: Inhibition of TGF $\beta$  in macrophages sensitizes Ccl3-high PDAC cells to gemcitabine-based chemotherapy.** Dose-response curves of RC416, DT4313 or PAN610 co-cultured with RAW264.7 macrophages (A,B) or as single cultures (C,D) after 72h of treatment with increasing doses of gemcitabine alone or in combination with 2 $\mu$ M galunisertib. Tables in B and D indicates EC50 values and 95% CIs of gemcitabine. (E,F) Cell viability of RC416 (E) or DT4313 (F) co-cultured with RAW264.7 macrophages transduced as indicated, after 72h of treatment with gemcitabine alone or in combination with 2 $\mu$ M galunisertib, in presence or absence of 100 ng/mL recombinant Lif (rLif). GAL: galunisertib; rLif: recombinant Lif.

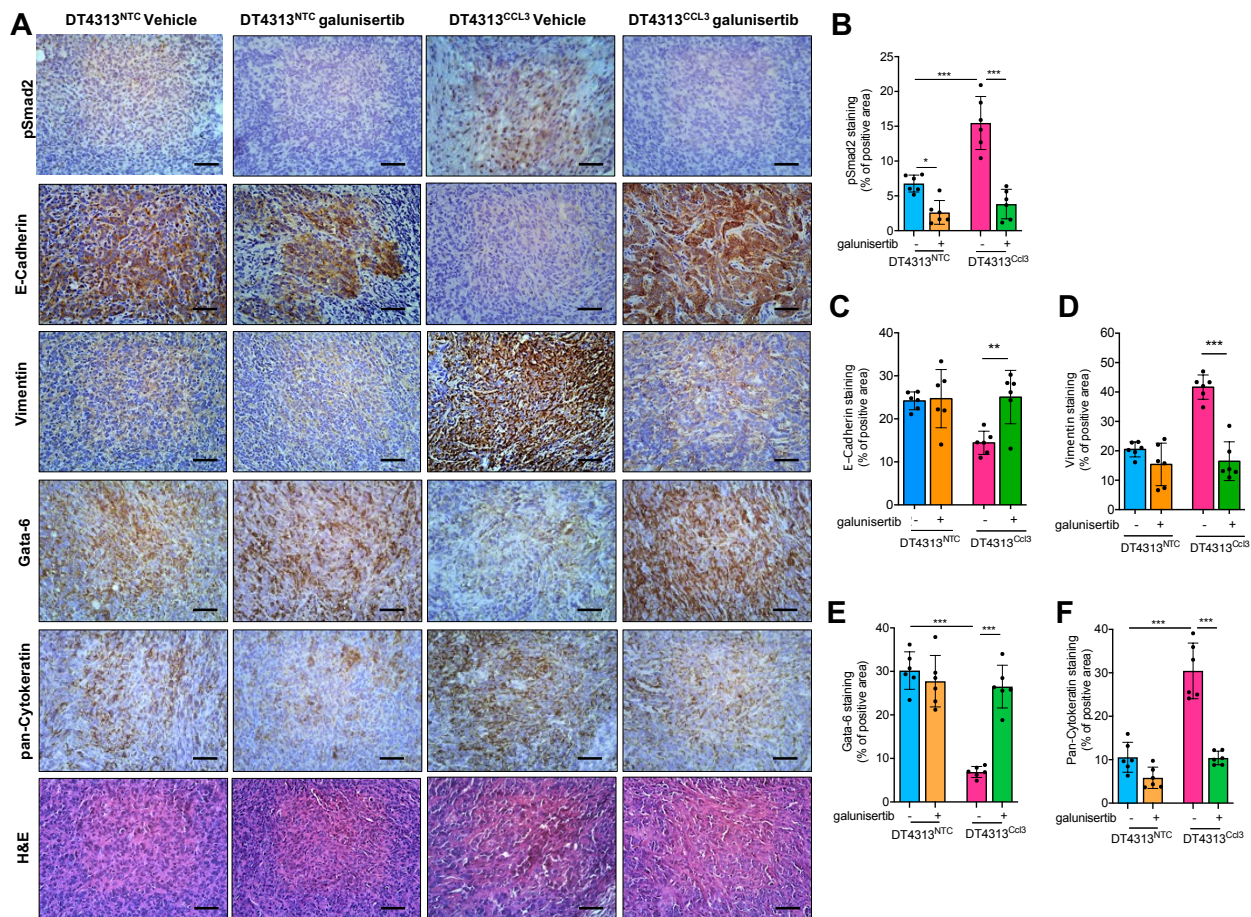

**Supplementary Figure 11. Galunisertib suppresses the mesenchymal/basal-like phenotype in mice bearing Ccl3-high tumors.** (A) Representative images for DT4313<sup>NTC</sup> or DT4313<sup>Ccl3</sup> tumors treated with either vehicle or galunisertib, stained with pSmad2, E-cadherin, vimentin, Gata-6 and cytokeratin antibodies and H&E. Scale bar=60  $\mu$ m. (B-F) Quantification of paraffin sections from orthotopic murine PDAC tumors stained as indicated in (A). Data in B-F are expressed as mean  $\pm$  s.d. (n=6). P values were calculated by two-tailed unpaired Student's t test. \*\*p<0.01; \*\*\*p<0.001.

**Supplementary Table 1. Baseline Characteristics of Patients enrolled in the H9H-MC-JBAJ randomized clinical trial.**

| <b>Baseline Characteristics</b> | <b>Galunisertib+Gemcitabine<br/>N = 104, n (%)</b> | <b>Placebo+Gemcitabine<br/>N = 52, n (%)</b> |
|---------------------------------|----------------------------------------------------|----------------------------------------------|
| Age, ≥65 years                  | 68 (65.4)                                          | 31 (59.6)                                    |
| Sex, male                       | 57 (54.8)                                          | 28 (53.9)                                    |
| ECOG performance status         |                                                    |                                              |
| 0                               | 34 (32.7)                                          | 19 (36.5)                                    |
| 1                               | 60 (57.7)                                          | 28 (53.9)                                    |
| 2                               | 10 (9.6)                                           | 5 (9.6)                                      |
| Disease stage IV                | 94 (90.4)                                          | 46 (88.5)                                    |
| Liver metastasis, Yes           | 60 (57.7)                                          | 26 (50)                                      |
| Number metastatic sites         |                                                    |                                              |
| 0                               | 17 (16.4)                                          | 10 (19.2)                                    |
| 1                               | 62 (59.6)                                          | 34 (65.4)                                    |
| ≥2                              | 25 (24.0)                                          | 8 (15.4)                                     |



**Supplementary Table 2. List of primers used in this study.**

| <b>Primer</b> | <b>Sequence (5' to 3')</b> |
|---------------|----------------------------|
| Ccl3 Fwd      | CAACCAAGTCTTCTCAGCGC       |
| Ccl3 Rev      | CTTTGGAGTCAGCGCAGATC       |
| Tgfb1 Fwd     | TTACCTTGGTAACCGGCTGC       |
| Tgfb1 Rev     | AGCCCTGTATTCCGTCTCCT       |
| Hprt Fwd      | AGTCCCAGCGTCGTGATTAG       |
| Hprt Rev      | GCCTCCCATCTCCTTCATGA       |
| Arg1 Fwd      | CTGAGCTTTGATGTGCGACGG      |
| Arg1 Rev      | TCCTCTGCTGTCTTCCCAAG       |
| iNos2 Fwd     | CCCCGCTACTACTCCATCAG       |
| iNos2 Rev     | CCACTGACACTTCGCACAAA       |
| Lif Fwd       | CGGGACAGAGAAGACCAAGT       |
| Lif Rev       | GGTACTTGTTGCACAGACGG       |
| Mrc1 Fwd      | ATGGGCAACATCGAGCAGAA       |
| Mrc1 Rev      | AAACCAATGCAACCCAGTGC       |
| Cd86 Fwd      | CCGGATGGTGTGTGGCATAT       |
| Cd86 Rev      | TGAGCAGCATCACAAGGAGG       |
| Fizz1 Fwd     | CCTGCTGGGATGACTGCTA        |
| Fizz1 Rev     | TGGGTTCTCCACCTCTTCAT       |

**Supplementary Table 3. List of antibodies used in this study.**

| <b>Antibody</b>                       | <b>Source</b>             | <b>Cat. No.</b> | <b>Dilution</b>            |
|---------------------------------------|---------------------------|-----------------|----------------------------|
| Ccl3                                  | R&D System                | AF-450-NA       | 1mg/ml (WB)                |
| E-Cadherin (24E10)                    | Cell Signaling Technology | #3195           | 1:1000 (WB)<br>1:200 (IHC) |
| Gapdh                                 | Thermo Fisher Scientific  | G9545           | 1:50000 (WB)               |
| Gata-6                                | ProteinTech               | 55435-1-AP      | 1:200 (IHC)                |
| Pan-cytokeratin                       | Novus Biologicals         | NB600-579       | 1:200 (IHC)                |
| Phospho-Smad2<br>(Ser465/467) (138D4) | Cell Signaling Technology | #3108           | 1:1000 (WB)<br>1:200 (IHC) |
| Smad2                                 | Cell Signaling Technology | #3103           | 1:1000                     |
| Vimentin                              | Abcam                     | ab92547         | 1:1000 (WB)<br>1:800 (IHC) |
| Ccr5                                  | Santa Cruz Technologies   | sc-17833        | 1:1000 (WB)                |
| Tgf $\beta$ 1                         | RayBiotech                | 102-11520       | 1:1000 (WB)                |
| Tgf $\beta$ r1                        | Abcam                     | ab31013         | 1:1000 (WB)                |
| Tgf $\beta$ r2                        | Santa Cruz Technologies   | sc-17799        | 1:500 (WB)                 |
| Actin                                 | Santa Cruz Technologies   | sc-47778        | 1:5000 (WB)                |
| Hsp90                                 | Santa Cruz Technologies   | sc-13119        | 1:10000 (WB)               |
| CD45-APC-Vio770                       | Miltenyi Biotec           | REA737          | 1:100 (FC)                 |
| Cd11b-PE-Vio615                       | Miltenyi Biotec           | REA592          | 1:100 (FC)                 |
| F4/80-PE                              | Miltenyi Biotec           | REA126          | 1:100 (FC)                 |
| CD86-Vio Bright B515                  | Miltenyi Biotec           | REA1190         | 1:100 (FC)                 |
| CD204-PE-Vio770                       | Miltenyi Biotec           | REA148          | 1:200 (FC)                 |

WB: Western blotting; IHC: Immunohistochemistry; FC: Flow cytometry.

**EXTENDED DATA: Uncropped and unprocessed scans of blots**

**Figure 3A**

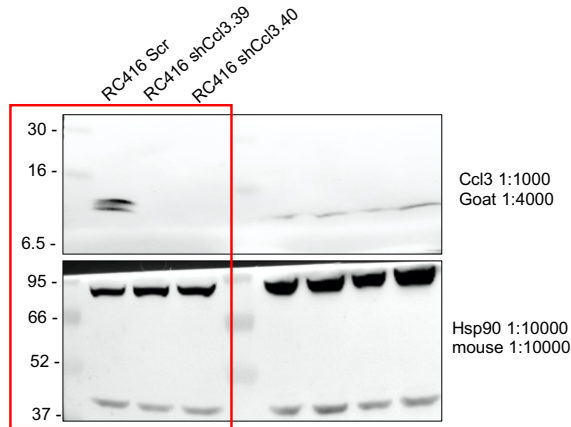

**Figure 3D**

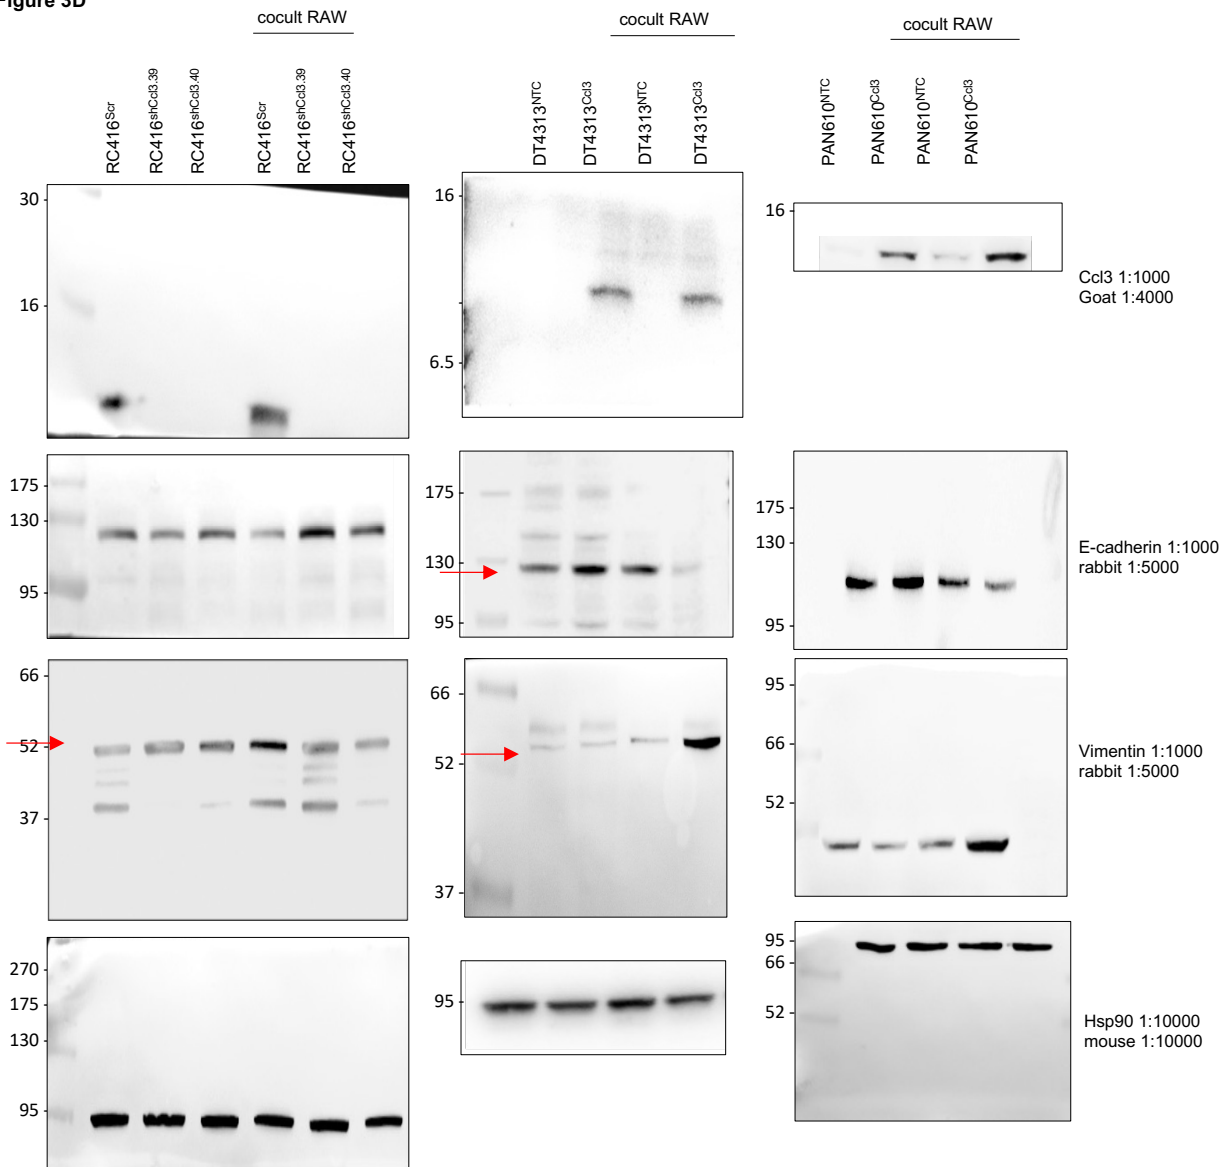

**Figure 4D**

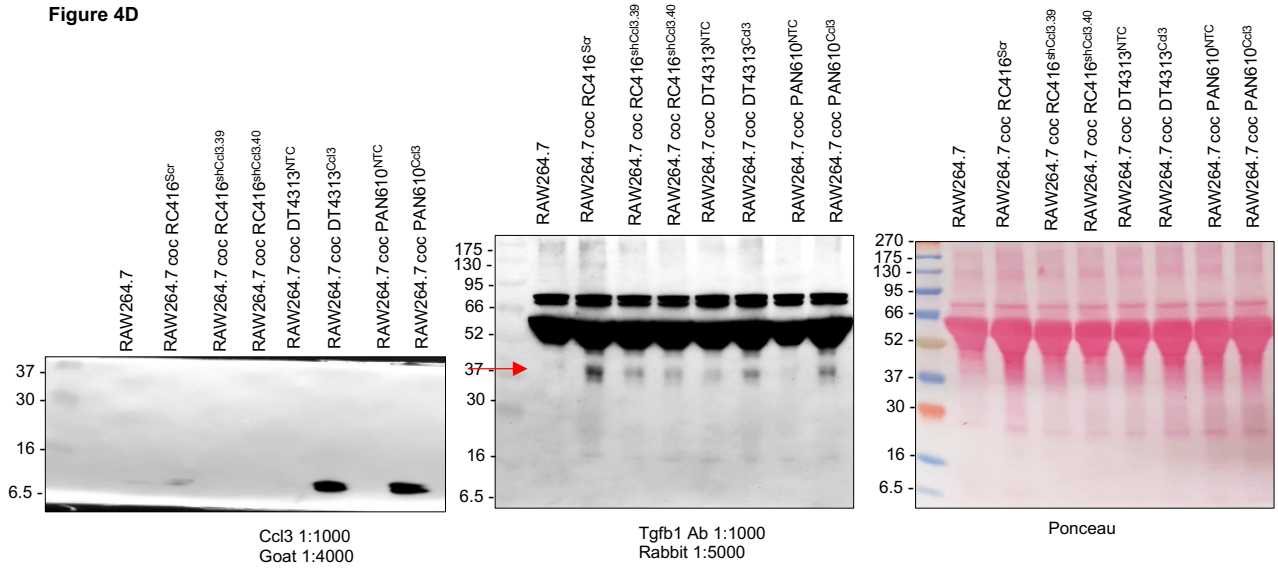

**Figure 4E**

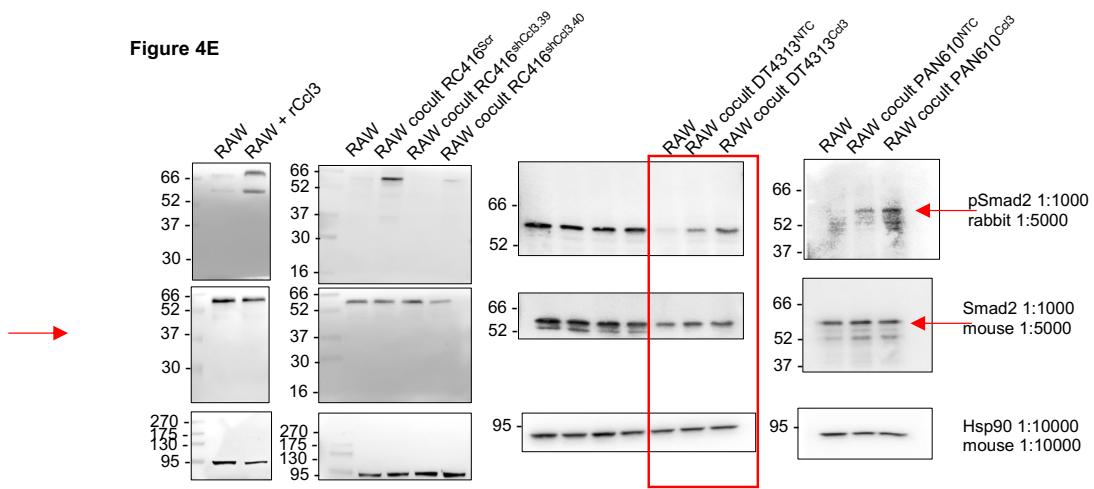

**Figure 4G**

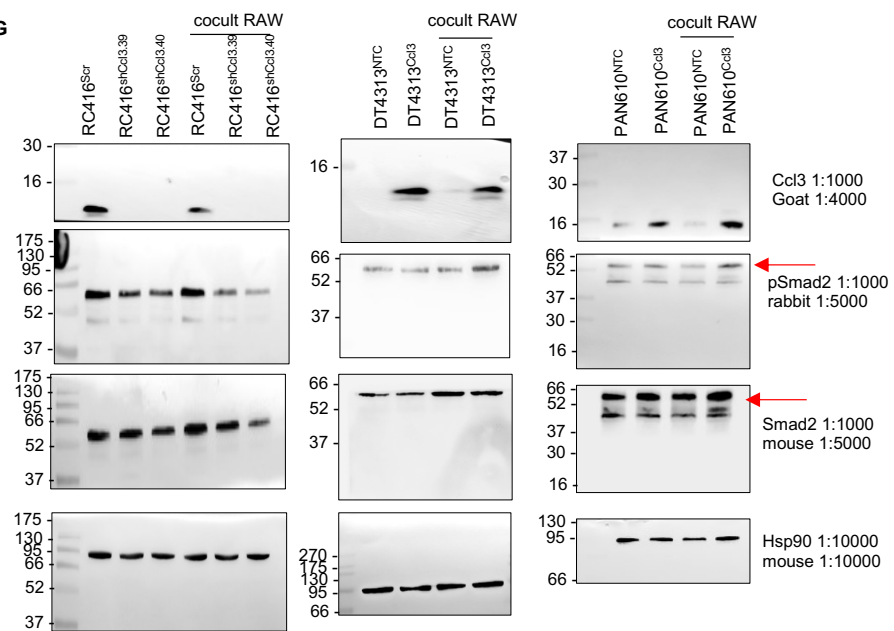

**Figure 5C**

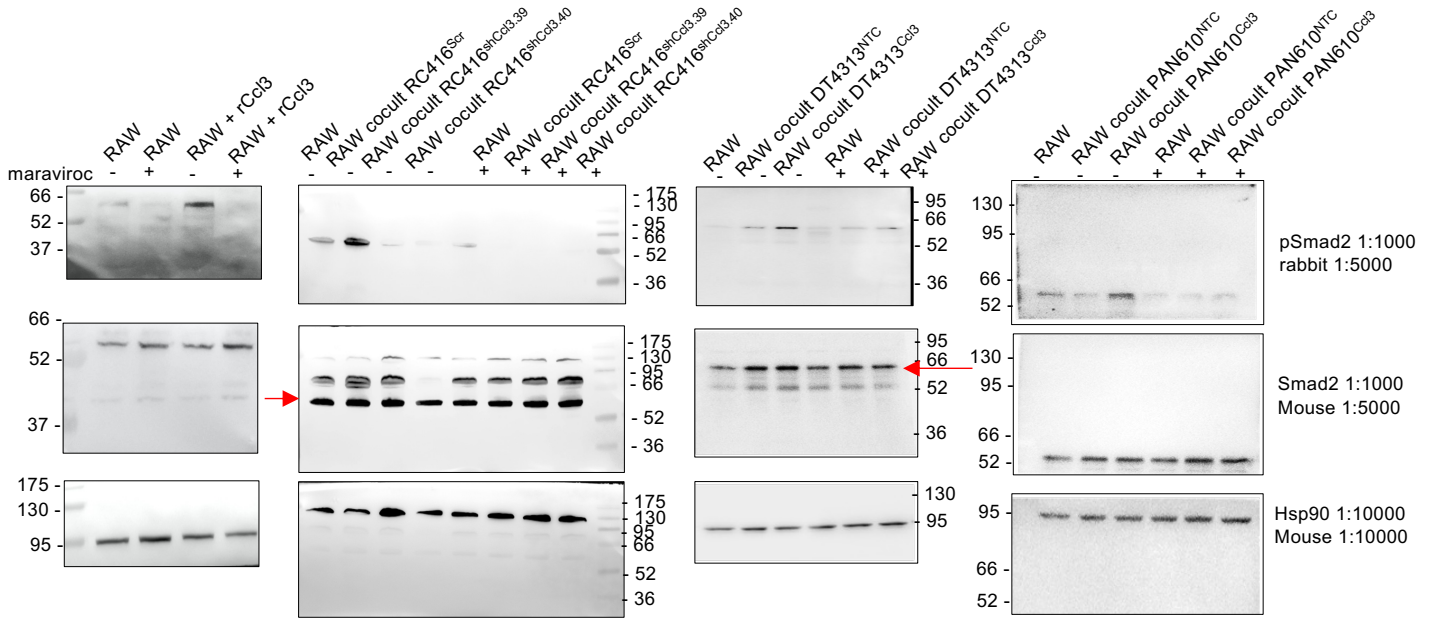

**Figure 5F**

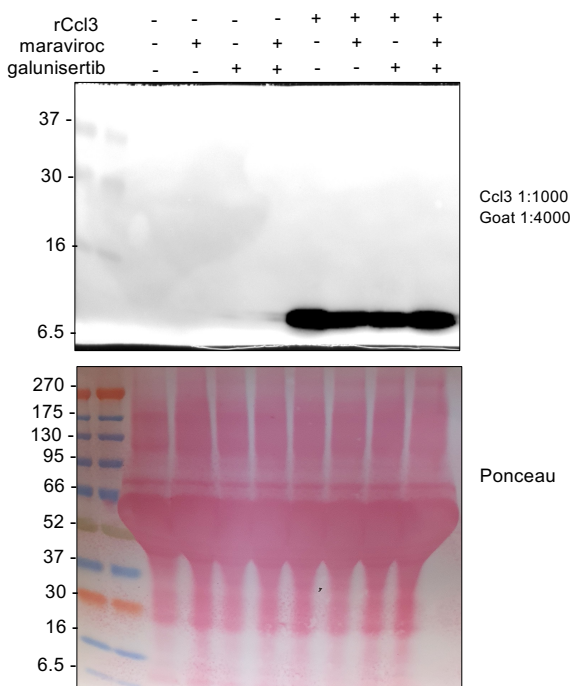

**Figure 5I**

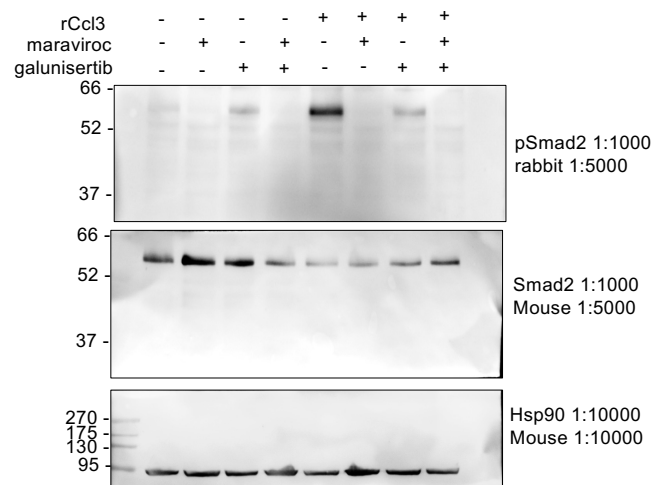

**Figure 6A**

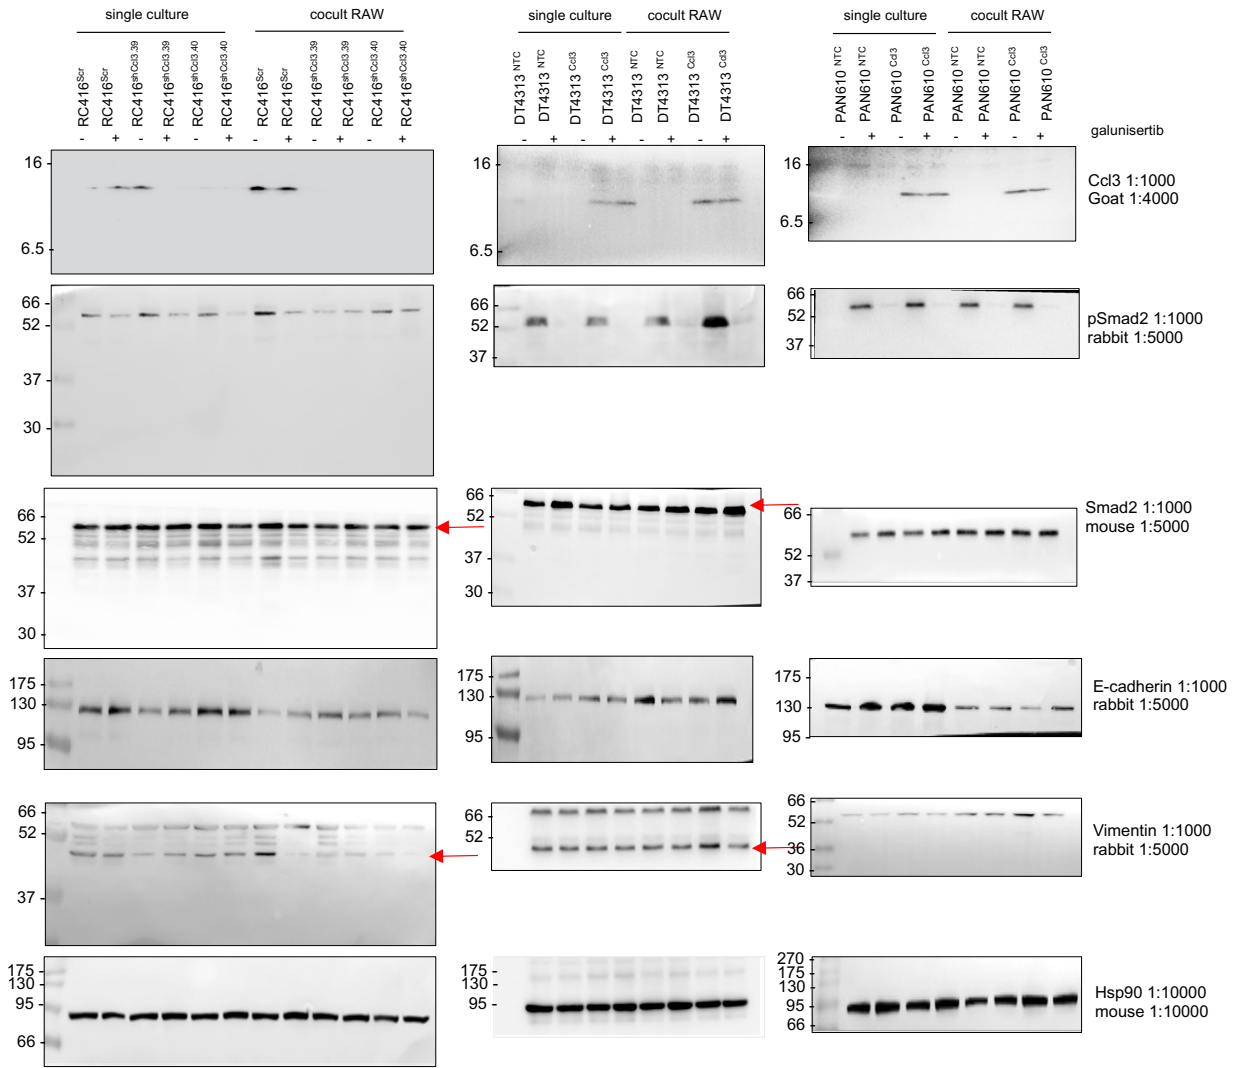



**Figure 6G**

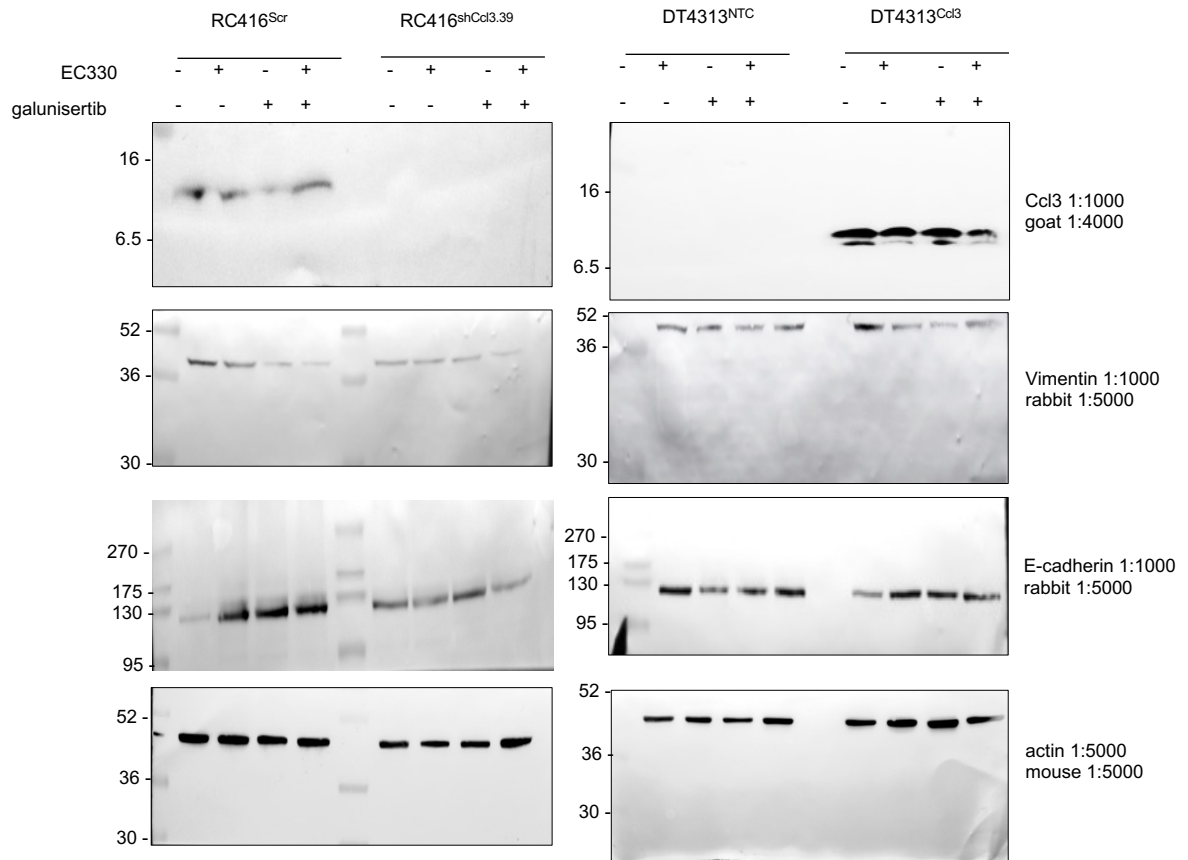

Figure S1B

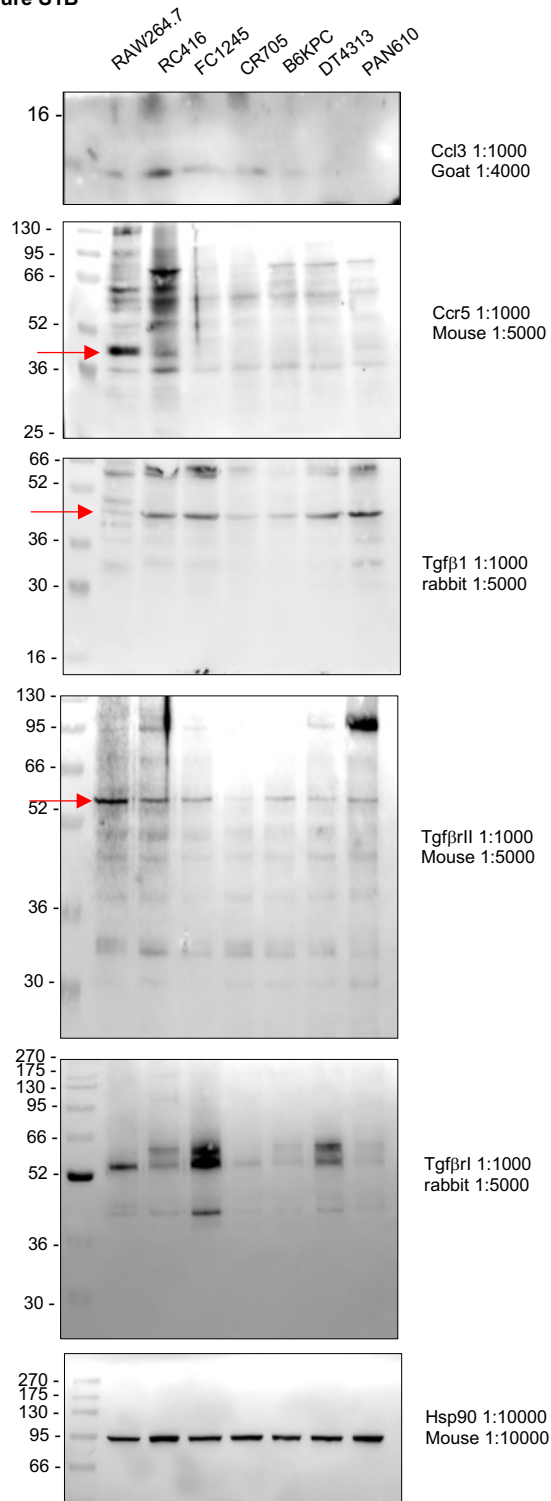

Figure S1C

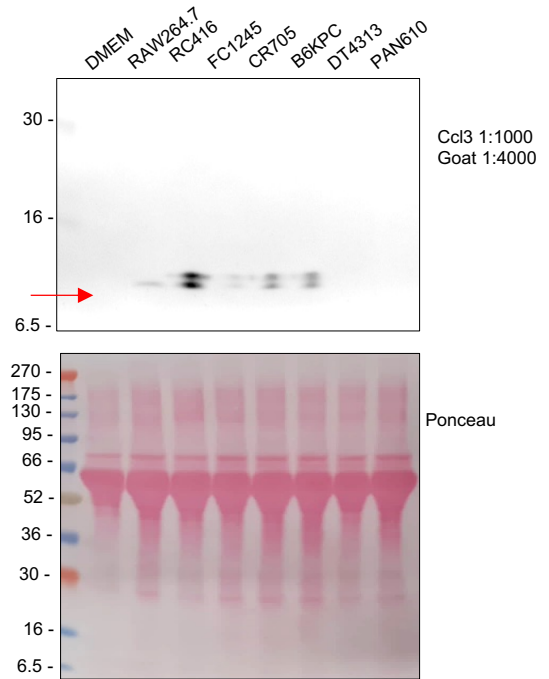

**Figure S3G**

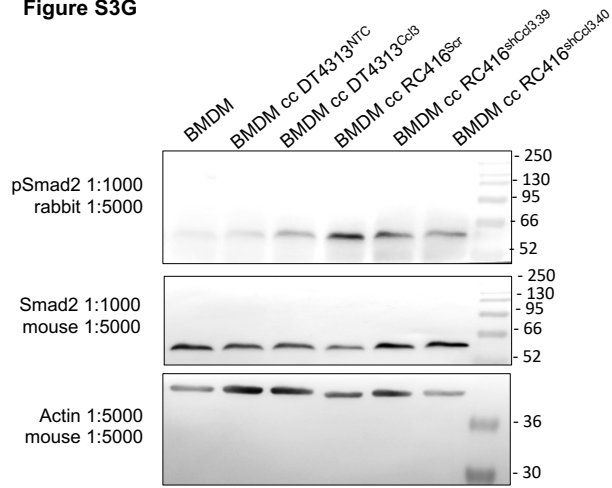

**Figure S7A**

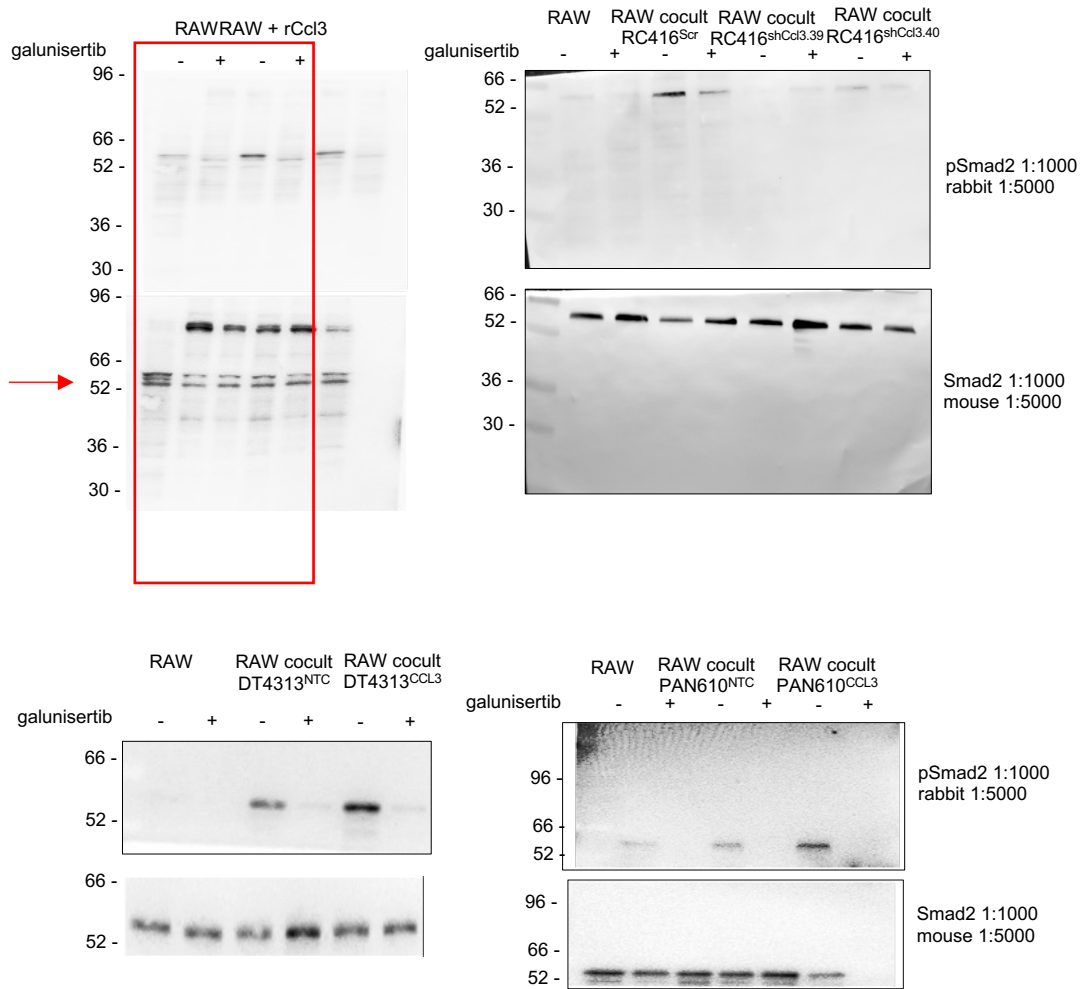



**Figure S9B**

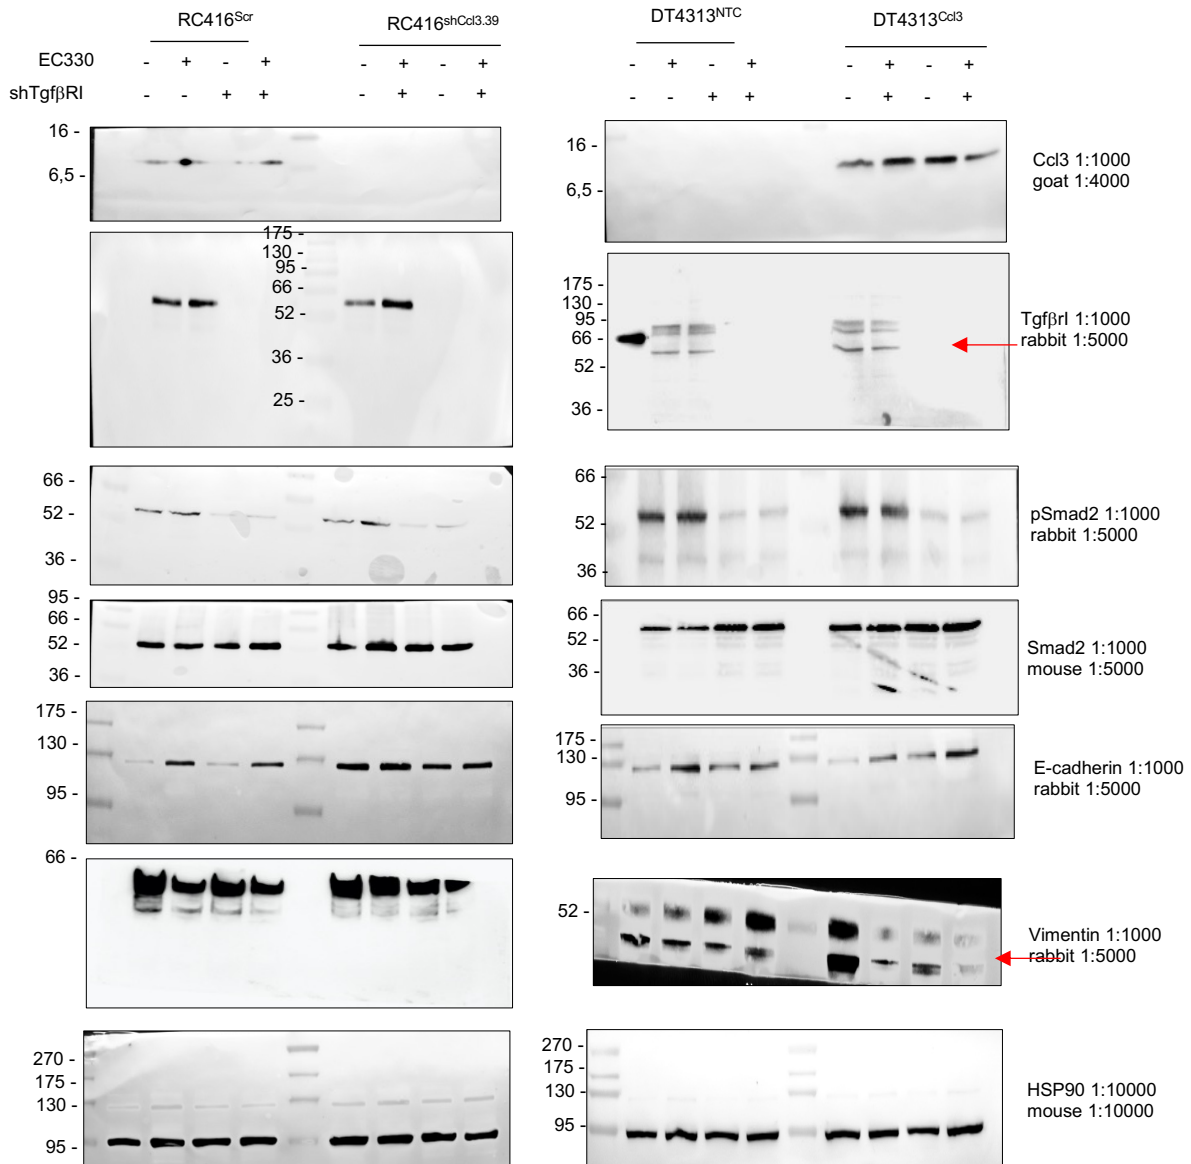

Supplement: 41698_2024_742_MOESM1_ESM.pdf [file 41698_2024_742_MOESM1_ESM.pdf]
